# Supplementary material for: “How do ethnic minority patients experience the intercultural care encounter in hospitals? a systematic review of qualitative research”
Source: PubMed Central journal article supplement (PMC5244561; doi:10.1186/s12910-016-0163-8), 2017-01-19
Supplement: 12910_2016_163_MOESM1_ESM.pdf [file 12910_2016_163_MOESM1_ESM.pdf]

Additional file 1: Full Search String

| Database       | Date       | String                                                                                                                                                                                                                                                                                                                                                                                                          | Search                                                      | Results  |
|----------------|------------|-----------------------------------------------------------------------------------------------------------------------------------------------------------------------------------------------------------------------------------------------------------------------------------------------------------------------------------------------------------------------------------------------------------------|-------------------------------------------------------------|----------|
| Pubmed         | 03/03/2015 | (multicultural OR intercultural OR cross-cultural OR transcultural) AND (multicultural OR intercultural OR cross-cultural OR transcultural OR ethnic groups OR migration OR immigrants OR minority) AND (views OR experiences OR attitudes OR perspectives OR qualitative research OR opinions) AND (hospitalization OR hospital OR institutionalization OR health care OR healthcare OR nursing)               | Advanced                                                    | n = 5397 |
| Cinahl         | 03/03/2015 | (multicultural OR intercultural OR cross-cultural OR transcultural) AND (multicultural OR intercultural OR cross-cultural OR transcultural OR ethnic groups OR migration OR immigrants OR minority) AND (views OR experiences OR attitudes OR perspectives OR qualitative research OR opinions) AND (hospitalization OR hospital OR institutionalization OR health care OR healthcare OR nursing)               | Advanced<br><i>(no "suggest subject terms")</i>             | n = 1188 |
| Medline        | 03/03/2015 | (multicultural OR intercultural OR cross-cultural OR transcultural) AND (multicultural OR intercultural OR cross-cultural OR transcultural OR ethnic groups OR migration OR immigrants OR minority) AND (views OR experiences OR attitudes OR perspectives OR qualitative research OR opinions) AND (hospitalization OR hospital OR institutionalization OR health care OR healthcare OR nursing)               | Multi-field                                                 | n = 2733 |
| Web of Science | 03/03/2015 | (multicultural OR intercultural OR cross-cultural OR transcultural) AND (multicultural OR intercultural OR cross-cultural OR transcultural OR ethnic groups OR migration OR immigrants OR minority) AND (views OR experiences OR attitudes OR perspectives OR qualitative research OR opinions) AND (hospitalization OR hospital OR institutionalization OR health care OR healthcare OR nursing)               | Basic search                                                | n = 1485 |
| Embase         | 03/03/2015 | (multicultural OR intercultural OR <b>cross cultural</b> OR transcultural) AND (multicultural OR intercultural OR <b>cross cultural</b> OR transcultural OR ethnic groups OR migration OR immigrants OR minority) AND (views OR experiences OR attitudes OR perspectives OR qualitative research OR opinions) AND (hospitalization OR hospital OR institutionalization OR health care OR healthcare OR nursing) | Quick search<br><i>(no "search as broadly as possible")</i> | n = 2043 |
