# Supplementary material for: “How do ethnic minority patients experience the intercultural care encounter in hospitals? a systematic review of qualitative research”
Source: PubMed Central journal article supplement (PMC5244561; doi:10.1186/s12910-016-0163-8), 2017-01-19
Supplement: 12910_2016_163_MOESM2_ESM.pdf [file 12910_2016_163_MOESM2_ESM.pdf]

## Additional file 2: Summary of characteristics of the included articles

|   | Author(s) / Year                             | Care setting/ Country   | Aim(s) of the study                                                                                                                                                                   | Method                                 | Sample & ethnicity patient                                                                                                                                                       | Theoretical framework & data analysis            | Ethical considerations                                                                                          |
|---|----------------------------------------------|-------------------------|---------------------------------------------------------------------------------------------------------------------------------------------------------------------------------------|----------------------------------------|----------------------------------------------------------------------------------------------------------------------------------------------------------------------------------|--------------------------------------------------|-----------------------------------------------------------------------------------------------------------------|
| 1 | <b>Amereskere et al.</b> (2011)              | Maternity care, US      | To explore Somali women's' perceptions of caesarean delivery and patient-provider communication surrounding female circumcision and childbirth                                        | Interview study                        | 23 Somali women                                                                                                                                                                  | Iterative approach of analysis                   | Approval by the institutional Review Board of Boston University Medical Campus                                  |
| 2 | <b>Arnaert and Schaack</b> (2006)            | Emergency care, Canada  | To explore Inuit patients' experiences with emergency nursing in an urban Health Centre, to inform on the best holistic nursing practices to meet culturally specific needs           | Interview study                        | 4 Inuit patients                                                                                                                                                                 | Comparative method by Strauss and Corbin         | Approval by the institution's Ethical Review Board and the Nunavik Regional Board of Health and Social services |
| 3 | <b>Baker and Daigle</b> (2000)               | Hospital care, Canada   | To explore the hospitalization experiences of members of the Mi'kmaq, First Nation Community to understand cultural sensitivity from their perspectives                               | Interview and thick descriptions study | 10 Mi'kmaq patients                                                                                                                                                              | Interpretive Interactionistic approach by Denzin | Efforts to deal with ethical considerations:<br>- informed consent<br>- anonymity<br>-confidentiality           |
| 4 | <b>Berggren, Bergstrom and Edberg</b> (2006) | Maternity care, Sweden  | To explore the experience of Female genital cutting and the experiences of encounters with Swedish maternal health care among women from Somalia, Eritrea, and Sudan living in Sweden | Interview study                        | 22 migrant women (Somalia, Sudan and Eritrea)                                                                                                                                    | Latent content analysis by Berg and Weber        | Approval by Ethics Committee of Karolinska Institute                                                            |
| 5 | <b>Binder et al.</b> * (2012)                | Maternity care, England | To explore the multi-ethnic care setting and the roles that ethnicity and language play during the care encounter between immigrant women and their western obstetric care providers  | Interview and focus group study        | 39 Somali women ( <i>reported</i> )<br>1 Ghanaian women ( <i>reported</i> )<br>10 white British women ( <i>not reported</i> )<br>62 obstetric caregivers ( <i>not reported</i> ) | Analysis according to naturalistic inquiry       | Approval by the Research Ethics Committee of NHS, United Kingdom                                                |

|   | <b>Author(s) / Year</b>                        | <b>Care setting/ Country</b> | <b>Aim(s) of the study</b>                                                                                                                                                                                                                                                     | <b>Method</b>                                                                                                                                                                                                                                                                                                               | <b>Sample &amp; ethnicity patient</b>                                                                                                                    | <b>Theoretical framework &amp; data analysis</b> | <b>Ethical considerations</b>                                             |
|---|------------------------------------------------|------------------------------|--------------------------------------------------------------------------------------------------------------------------------------------------------------------------------------------------------------------------------------------------------------------------------|-----------------------------------------------------------------------------------------------------------------------------------------------------------------------------------------------------------------------------------------------------------------------------------------------------------------------------|----------------------------------------------------------------------------------------------------------------------------------------------------------|--------------------------------------------------|---------------------------------------------------------------------------|
| 6 | <b>Binder, Johnsdotter and Essén</b> (2012)    | Maternity care, England      | To explore the influence of pre-migration socio-cultural factors on post-migration maternal care seeking and barrier-causing delays to women's utilisation of facility care and to understand the reasons behind barriers between immigrant women and maternal care providers. | Interview and focus group study                                                                                                                                                                                                                                                                                             | 54 migrant women (sub-Saharan regions, Africa)<br>62 maternal caregivers<br><i>(not reported)</i>                                                        | Constructivist Hermeneutic Naturalistic approach | Approval by the Research Ethics Committee of NHS, United Kingdom          |
| 7 | <b>Chalmers and Omer-Hashi</b> (2002)          | Maternity care, Canada       | To explore the experiences of Somali women who had recently given birth to a baby in Canada and to gain information about these women's perceptions of their recent care during pregnancy and birth                                                                            | <b>Mixed-method study</b><br>- qualitative interviews<br><i>(reported)</i><br>- quantitative closed-ended interviews<br><i>(not reported)</i><br><i>(part of larger mixed method study)</i>                                                                                                                                 | 432 Somali women                                                                                                                                         | Descriptive content analysis                     | Approval by the Ethics Committee of Women's College Hospital in Toronto   |
| 8 | <b>Cheragi, Manookian and Nasrabadi</b> (2014) | Hospital care, Iran          | To identify common experiences of Iranian Muslim and Armenian Christian patients regarding dignified care at the bedside                                                                                                                                                       | Interview study (qualitative part of larger study)                                                                                                                                                                                                                                                                          | 5 Iranian Armenians<br><i>(reported)</i><br>5 Iranian Muslims<br><i>(not reported)</i>                                                                   | Inductive content analysis                       | Approval by the Ethics Committee of Tehran University of Medical Sciences |
| 9 | <b>Cheung **</b> (2002a)                       | Maternity care, Scotland     | To provide insights as to how women's childbearing experiences might be improved                                                                                                                                                                                               | <b>Interview, participant observational and literature review stud</b><br>- semi-structured interviews (patients, reported)<br>- unstructured interviews (health workers, relatives and friends, not reported)<br>- participant observations (patients, reported)<br>- literature review and case comparison (not reported) | 10 Chinese women<br><i>(reported)</i><br>10 Scottish women<br><i>(not reported)</i><br>45 health workers; relatives and friends<br><i>(not reported)</i> | Comparative analysis                             | Approval by the Ethics Committee of the local Health Board                |

|    | <b>Author(s) / Year</b>                  | <b>Care setting/ Country</b> | <b>Aim(s) of the study</b>                                                                                                                                       | <b>Method</b>                                                                                                                                                                                                                                                                                                                                                    | <b>Sample &amp; ethnicity patient</b>                                                                                                                 | <b>Theoretical framework &amp; data analysis</b>                                                                                                              | <b>Ethical considerations</b>                              |
|----|------------------------------------------|------------------------------|------------------------------------------------------------------------------------------------------------------------------------------------------------------|------------------------------------------------------------------------------------------------------------------------------------------------------------------------------------------------------------------------------------------------------------------------------------------------------------------------------------------------------------------|-------------------------------------------------------------------------------------------------------------------------------------------------------|---------------------------------------------------------------------------------------------------------------------------------------------------------------|------------------------------------------------------------|
| 10 | <b>Cheung **</b><br>(2002b)              | Maternity care, Scotland     | To analyse the meanings that women gave to their childbearing experiences in order to provide some useful insights as to how their experiences might be improved | <b>Interview, participant observational and literature review study</b><br>- semi-structured interviews ( <i>patients, reported</i> )<br>- unstructured interviews ( <i>health workers, relatives and friends, not reported</i> )<br>- participant observations ( <i>patients, reported</i> )<br>- literature review and case comparison ( <i>not reported</i> ) | 10 Chinese women ( <i>reported</i> )<br>10 Scottish women ( <i>not reported</i> )<br>45 health workers; relatives and friends ( <i>not reported</i> ) | Anthropological contemporary fieldwork approach<br>1.) Textual and content analysis<br>2.) Contextual, comparative analysis                                   | Approval by the Ethics Committee of the local Health Board |
| 11 | <b>Cortis ***</b><br>(2000a)             | Hospital care, UK            | To explore the Pakistani immigrants' concept of care and their experiences of care delivered in hospital in UK                                                   | Interview study                                                                                                                                                                                                                                                                                                                                                  | 20 male Pakistani<br>18 female Pakistani                                                                                                              | Framework of Leininger's Theory of Culture Care Diversity and Universality & Leininger's four phase of ethnonursing data analysis<br>Grounded theory approach | /                                                          |
| 12 | <b>Cortis</b> (2000b)                    | Hospital care, UK            | To explore the lived experiences of Pakistani communities that received nursing care in a hospital setting                                                       | Interview and focus group study                                                                                                                                                                                                                                                                                                                                  | 30 male Pakistani Muslim (Urdu-speaking)<br>25 female Pakistani Muslim (Urdu-speaking)                                                                | Theoretical framework of Leininger's Theory of Culture Care Diversity and Universality & Leininger's four phase of ethnonursing data analysis                 | /                                                          |
| 13 | <b>Cortis and Kendrick ***</b><br>(2003) | Hospital care, UK            | To explore the expectations and perceived experiences of nursing care among members of the Pakistani community in UK                                             | Interview study                                                                                                                                                                                                                                                                                                                                                  | 20 male Pakistani<br>18 female Pakistani                                                                                                              | Theoretical framework of Leininger's Theory of Culture Care Diversity and Universality & Leininger's four phase of ethnonursing data analysis                 | /                                                          |

|    | <b>Author(s) / Year</b>                       | <b>Care setting/ Country</b> | <b>Aim(s) of the study</b>                                                                                                                                                                       | <b>Method</b>                                                                                                                                                                                                                                                                                 | <b>Sample &amp; ethnicity patient</b>                                                                                                                                    | <b>Theoretical framework &amp; data analysis</b>               | <b>Ethical considerations</b>                                                                                                            |
|----|-----------------------------------------------|------------------------------|--------------------------------------------------------------------------------------------------------------------------------------------------------------------------------------------------|-----------------------------------------------------------------------------------------------------------------------------------------------------------------------------------------------------------------------------------------------------------------------------------------------|--------------------------------------------------------------------------------------------------------------------------------------------------------------------------|----------------------------------------------------------------|------------------------------------------------------------------------------------------------------------------------------------------|
| 14 | <b>Eckhardt and Mott and Andrew</b> (2006)    | Hospital care, Australia     | To explore the experiences of six older German- born women who had undergo planned admission to hospital in Australia                                                                            | Interview study                                                                                                                                                                                                                                                                               | 6 German                                                                                                                                                                 | Descriptive phenomenology approach & content or theme analysis | Approval by institutional Ethics Committee                                                                                               |
| 15 | <b>Essén et al.</b> (2000)                    | Maternity care, Sweden       | To explore attitudes, strategies and habits of Somalian immigrant women related to pregnancy and childbirth in order to understand how cultural factors might affect perinatal outcome           | Interview study                                                                                                                                                                                                                                                                               | 15 Somali women                                                                                                                                                          | Medical-anthropological approach & systematic text analysis    | Approval by the Ethical Research Committee of Lund University                                                                            |
| 16 | <b>Essén, Binder and Johnsdotter *</b> (2011) | Maternity care, England      | To explore the relationship between Somali women and their western obstetric care providers. The attitudes, perceptions, beliefs and experiences will be explored in relation to caesarean birth | Interview and focus group study                                                                                                                                                                                                                                                               | 39 Somali women ( <i>reported</i> )<br>62 obstetric care providers ( <i>not reported</i> )                                                                               | Anthropological naturalistic inquiry approach                  | Approval by the Riverside Research Ethics Committee of London                                                                            |
| 17 | <b>Fenwick and Stevens</b> (2004)             | Surgical care, Australia     | To explore the postoperative pain experiences of Central Australian Aboriginal women                                                                                                             | <b><i>Interview, focus group and participant observational study</i></b><br>- interview and participant observation ( <i>Aboriginal women, reported</i> )<br>- interview and participant observation ( <i>nurses, not reported</i> )<br>- focus group ( <i>health workers, not reported</i> ) | 5 Aboriginal female patients ( <i>reported</i> )<br>8 non-Aboriginal female nurses ( <i>not reported</i> )<br>4 Aboriginal female health workers ( <i>not reported</i> ) | Grounded theory approach & constant comparative analysis       | Approval by Southern Cross University Research Ethics Committee and the Aboriginal Ethics subcommittee attached to the regional hospital |
| 18 | <b>Garrett et al.****</b> (2008a)             | Hospital care, Australia     | To explore the experiences of patients with little or no English who either attended the Emergency Department of were admitted to the wards of a tertiary referral hospital                      | Language-specific focus group study ( <i>Part of larger study</i> )                                                                                                                                                                                                                           | 49 patients ( <i>reported</i> ) (Vietnamese, Italian, Arabic, Spanish, Croatian, Chinese and Serbian speaking)<br>9 carers of these patients ( <i>not reported</i> )     | Grounded theory approach                                       | Approval by the Human Research Ethics Committee of the Sydney South West Area Health Service (Western Zone)                              |

|    | <b>Author(s) / Year</b>                    | <b>Care setting/ Country</b> | <b>Aim(s) of the study</b>                                                                                                                                                | <b>Method</b>                                                                                                                                     | <b>Sample &amp; ethnicity patient</b>                                                                                                                                                                   | <b>Theoretical framework &amp; data analysis</b>                  | <b>Ethical considerations</b>                                                                                      |
|----|--------------------------------------------|------------------------------|---------------------------------------------------------------------------------------------------------------------------------------------------------------------------|---------------------------------------------------------------------------------------------------------------------------------------------------|---------------------------------------------------------------------------------------------------------------------------------------------------------------------------------------------------------|-------------------------------------------------------------------|--------------------------------------------------------------------------------------------------------------------|
| 19 | <b>Garrett et al.****</b> (2008b)          | Hospital care, Australia     | To explore conceptions of cultural competence in the experiences of non-English speaking acute care patients                                                              | Language-specific focus group study ( <i>Part of larger study</i> )                                                                               | 49 acute hospital patients ( <i>reported</i> ) (Vietnamese, Italian, Arabic, Spanish, Croatian, Chinese and Serbian speaking)<br>10 carers from non-English-speaking background ( <i>not reported</i> ) | Grounded theory approach & constructivist perspective             | Approval by the South Western Sydney Area Health Service Ethics Committee                                          |
| 20 | <b>Grewal, Bhagat and Balneaves</b> (2008) | Maternity care, Canada       | To explore new immigrant Punjabi women's perinatal experiences and the ways that traditional beliefs and practices are incorporated into the Canadian health care context | <b>Interview and focus group study</b><br>- Interview study ( <i>mothers, reported</i> )<br>- Focus groups study ( <i>experts, not reported</i> ) | 15 Punjab mothers ( <i>reported</i> )<br>5 health professionals and community leaders ( <i>not reported</i> )                                                                                           | Naturalistic, descriptive approach & line-by-line analysis        | Approval by Institutional Ethical Committee                                                                        |
| 21 | <b>Hanrahan</b> (2002)                     | Hospital care, Canada        | To explore Innu and Inuit people's experiences of health services in the urban centres of St. John's and Goose Bay                                                        | <b>Interview and focus group study</b><br>- interviews ( <i>patients, reported</i> )<br>- interviews ( <i>caregivers, not reported</i> )          | 25 Innu patients<br>118 Inuit patients<br>8 health care practitioners ( <i>not reported</i> )                                                                                                           | Content analysis                                                  | Approval by the Human Investigation committee of the Health Care Corporation of St. John's and Faculty of Medicine |
| 22 | <b>Harle et al.</b> (2007)                 | Cancer care, US              | To explore the experiences of Filipino patients with cancer and to inform nurses in delivering culturally appropriate care                                                | Focus group study                                                                                                                                 | 18 female Filipino patients<br>5 male Filipino patients                                                                                                                                                 | Hermeneutic phenomenological approach & phenomenological analysis | Approval by the Institutional Review Board of a major comprehensive cancer center and its affiliated university    |

|    | <b>Author(s) / Year</b>             | <b>Care setting/ Country</b> | <b>Aim(s) of the study</b>                                                                                                                                                            | <b>Method</b>                                                  | <b>Sample &amp; ethnicity patient</b>                                                                                                                                                                   | <b>Theoretical framework &amp; data analysis</b>                          | <b>Ethical considerations</b>                                           |
|----|-------------------------------------|------------------------------|---------------------------------------------------------------------------------------------------------------------------------------------------------------------------------------|----------------------------------------------------------------|---------------------------------------------------------------------------------------------------------------------------------------------------------------------------------------------------------|---------------------------------------------------------------------------|-------------------------------------------------------------------------|
| 23 | <b>Herrel et al.</b> (2004)         | Maternity care, US           | To explore how Somali women have experienced pregnancy and Childbirth in Minnesota                                                                                                    | Focus group study                                              | 14 Somali women                                                                                                                                                                                         | /                                                                         | Approval by the Park Nicollet Institute Institutional Review Board      |
| 24 | <b>Higginbottom et al.</b> (2013)   | Maternity care, Canada       | To explore the maternity experiences of women of Sudanese origin in an urban Canadian city                                                                                            | Focus group study ( <i>Part of larger mixed-method study</i> ) | 12 Sudanese women                                                                                                                                                                                       | Focused ethnography approach & ethnographic analysis by Roper and Shapira | Approval by the institutional review board of the University of Alberta |
| 25 | <b>Higginbottom et al.</b> (2015)   | Maternity care, Canada       | To identify the nature of communication difficulties and to gain insight into the issues related to maternity care access and care provision from the perspectives of immigrant women | Interview study ( <i>Part of larger mixed-method study</i> )   | 12 women ( <i>reported</i> ) ( <i>Africa, Pakistan, Congolese-Canadian, Philippines, Eritrea</i> ), 12 health care providers ( <i>not reported</i> ) 6 social service providers ( <i>not reported</i> ) | Focused ethnography approach & ethnographic analysis by Roper and Shapira | Approval by the Ethics Board of University of Alberta                   |
| 26 | <b>Hill, Hunt and Hyrkas</b> (2012) | Maternity care, US           | To explore Somali immigrant women's health care experiences and beliefs regarding pregnancy and birth in the US                                                                       | Focus group study                                              | 18 Somali women                                                                                                                                                                                         | Thematic content analysis                                                 | Approval by the institutional Review Board of the hospital              |
| 27 | <b>Hoang and Kilpatrick</b> (2009)  | Maternity care, Australia    | To explore Asian migrant women's child-birth experiences in a rural Australian context                                                                                                | Interview study                                                | 11 Asian women                                                                                                                                                                                          | Grounded theory approach by Strauss and Corbin                            | Approval by the Tasmanian Social Sciences Human Research Ethics Network |

|    | <b>Author(s) / Year</b>              | <b>Care setting/ Country</b> | <b>Aim(s) of the study</b>                                                                                                                                             | <b>Method</b>                                                | <b>Sample &amp; ethnicity patient</b>                                                            | <b>Theoretical framework &amp; data analysis</b>                              | <b>Ethical considerations</b>                                                 |
|----|--------------------------------------|------------------------------|------------------------------------------------------------------------------------------------------------------------------------------------------------------------|--------------------------------------------------------------|--------------------------------------------------------------------------------------------------|-------------------------------------------------------------------------------|-------------------------------------------------------------------------------|
| 28 | <b>Johnson (2002)</b>                | Primary care clinic, US      | To explore Hmong perspectives and beliefs that influence the Hmong experience in Western medical situations                                                            | Interview, focus group and participant observational study   | 11 Hmong women (Laos)<br>8 Hmong men (Laos)                                                      | Ethnographic approach                                                         | Approval by the Committee on Human Research of San Francisco State University |
| 29 | <b>Jonkers et al. (2011)</b>         | Maternity care, Netherlands  | To explore ethnicity-related factors contributing to sub-standard maternity care and the effects on severe maternal morbidity among immigrant women in the Netherlands | Interview study                                              | 40 immigrant women ( <i>reported</i> )<br>10 native Dutch women ( <i>not reported</i> )          | Thematic analysis                                                             | Approval by Medical Ethical Committee of Leiden University Medical Center     |
| 30 | <b>Killoran and Moyer (2006)</b>     | Oncology care, US            | To explore the cultural factors that influence the selection of treatments by Chinese-American patients                                                                | Interview, focus group and observational study               | 69 Chinese-American women ( <i>reported</i> )<br>14 health professionals ( <i>not reported</i> ) | Ethnographic approach & comparative triangulation analysis                    | Efforts to deal with ethical considerations:<br>- verbal informed consent     |
| 31 | <b>Lee et al. (2014)</b>             | Maternity care, Canada       | To explore immigrant Chinese women's experiences in accessing maternity care, the utilization of maternity health services, and the obstacles they perceived in Canada | Interview study                                              | 15 Chinese patients                                                                              | Descriptive phenomenological approach & phenomenological analysis by Colaizzi | Approval by Research Ethics Board of York University's                        |
| 32 | <b>Liamputtong and Watson (2006)</b> | Maternity care, Australia    | To explore the experience of caesarean birth among 67 Cambodian, Lao, and Vietnamese women living in Australia                                                         | Interview study ( <i>part of larger ethnographic study</i> ) | 67 women, ( <i>21 from Laos, 21 Vietnam, 25 Cambodia</i> )                                       | Thematic analysis                                                             | Approval by La Trobe University Human Ethics Committee.                       |

|    | <b>Author(s) / Year</b>                 | <b>Care setting/ Country</b> | <b>Aim(s) of the study</b>                                                                                                                                                                                                                                                                                                                          | <b>Method</b>                                                                                                                            | <b>Sample &amp; ethnicity patient</b>                          | <b>Theoretical framework &amp; data analysis</b>                                                                           | <b>Ethical considerations</b>                                                                                                                                                                        |
|----|-----------------------------------------|------------------------------|-----------------------------------------------------------------------------------------------------------------------------------------------------------------------------------------------------------------------------------------------------------------------------------------------------------------------------------------------------|------------------------------------------------------------------------------------------------------------------------------------------|----------------------------------------------------------------|----------------------------------------------------------------------------------------------------------------------------|------------------------------------------------------------------------------------------------------------------------------------------------------------------------------------------------------|
| 33 | <b>Lim, Baik and Ashing-Giwa</b> (2012) | Hospital care, US            | To explore the relationships between cultural health beliefs, acculturation, treatment-related decisions, doctor-patient relationship and health behaviours among Asian American breast cancer survivors and the contextual meaning of those relationships among Korean American breast cancer survivors and Asian American breast cancer survivors | <b>Mixed-method study</b><br>- qualitative focus groups study ( <i>reported</i> )<br>- quantitative survey study ( <i>not reported</i> ) | 11 Korean American breast cancer survivors ( <i>reported</i> ) | Descriptive, exploratory approach                                                                                          | Approval by the institutional Review Board of City of Hope National Medical Center                                                                                                                   |
| 34 | <b>Lundberg and Gerezgiher</b> (2006)   | Maternity care, Sweden       | To explore Eritrean immigrant women's experiences of female genital mutilation during pregnancy, childbirth and the postpartum period                                                                                                                                                                                                               | Interview study                                                                                                                          | 15 Eritrean women                                              | Ethnographic approach & thematic analysis                                                                                  | Efforts to deal ethical considerations:<br>- written and oral presentation<br>- written informed consent<br>- anonymity<br>- confidentiality<br>- coding of informant<br>-destroying tape recordings |
| 35 | <b>Maputle and Jali</b> (2006)          | Maternity care, South Africa | To explore the current and patterned care life ways of mothers from diverse cultural groups that deliver their babies at the hospital in Limpopo Province                                                                                                                                                                                           | Interview study with semi-structured and unstructured conversations                                                                      | 24 women from diverse ethnic groups (N.Sotho, Tsonga, Venda)   | Ethnographic approach, analysis according to Mile's and Huberman Theoretical framework of Leininger's Sunrise Model theory | Efforts to deal with ethical considerations:<br>- Informed consent                                                                                                                                   |



|    | <b>Author(s) / Year</b>                     | <b>Care setting/ Country</b> | <b>Aim(s) of the study</b>                                                                                                                                                                                                    | <b>Method</b>                                                                                                                             | <b>Sample &amp; ethnicity patient</b>                                               | <b>Theoretical framework &amp; data analysis</b>                                                                                                  | <b>Ethical considerations</b>                                                   |
|----|---------------------------------------------|------------------------------|-------------------------------------------------------------------------------------------------------------------------------------------------------------------------------------------------------------------------------|-------------------------------------------------------------------------------------------------------------------------------------------|-------------------------------------------------------------------------------------|---------------------------------------------------------------------------------------------------------------------------------------------------|---------------------------------------------------------------------------------|
| 36 | <b>McFadden, Renfrew and Atkin</b> (2013)   | Maternity care, England      | To explore the extent to which cultural context makes a difference to experiences of breast-feeding support for women of Bangladeshi origin and to consider the implications for the provision of culturally appropriate care | Interview and focus group study<br>- interviews ( <i>women, reported</i> )<br>- focus group ( <i>health practitioners, not reported</i> ) | 23 women of Bangladeshi origin<br>4 health service managers ( <i>not reported</i> ) | /                                                                                                                                                 | Approval by the Research Ethics Committee of North West NHS                     |
| 37 | <b>Missal, Clark and Kovaleva</b> (2015)    | Maternity care, US           | To explore Somali immigrant new mother's experience of childbirth in Minnesota                                                                                                                                                | Interview study                                                                                                                           | 12 Somali women                                                                     | Framework of Leininger's Theory of Culture Care Diversity and Universality & Leininger's and McFarland's four phase of ethnonursing data analysis | Approval by the institutional Review Board of the university                    |
| 38 | <b>Murray et al.</b> (2009)                 | Maternity care, Australia    | To explore the birth experiences of African refugee women in Australia                                                                                                                                                        | Interview study                                                                                                                           | 10 African refugees                                                                 | Husserlian phenomenological framework & analysis according to Amedo Giorgi                                                                        | Approval by Technology Human Research Ethics Committee of Queensland University |
| 39 | <b>Niner, Kokanovic and Cuthbert</b> (2013) | Obstetric care, Australia    | To explore the effects of inequality consequent on displacement through a focus on the birthing experiences of forced migrant women in Australian hospitals                                                                   | Interview study                                                                                                                           | 15 Karen women ( <i>Burma-Myanmar</i> )                                             | Ethnographical approach                                                                                                                           | /                                                                               |
| 40 | <b>Pasco, Morse and Olson</b> (2004)        | Hospital care, Canada        | To describe culturally embedded values that implicitly guide Filipino Canadian patient's interactions with Canadian nurses and are integral to nurse-patient relationships                                                    | Interview study ( <i>ethnographic interviews, field notes and diary</i> )                                                                 | 23 Filipino patients                                                                | Focused ethnographical approach                                                                                                                   | Approval by appropriate University and Ethical Agency                           |
| 41 | <b>Qureshi and Pacquiao</b> (2013)          | Maternity care, US           | To explore the comparative birthing experiences of Pakistani immigrant women in Pakistan and the united states                                                                                                                | Interview study                                                                                                                           | 26 Pakistani women                                                                  | Ethnographical approach by Berry's framework                                                                                                      | Efforts to deal with ethical considerations:<br>-Informed consent               |

|    | <b>Author(s) / Year</b>                | <b>Care setting/ Country</b>    | <b>Aim(s) of the study</b>                                                                                                                                              | <b>Method</b>                                                                                  | <b>Sample &amp; ethnicity patient</b>                                                                     | <b>Theoretical framework &amp; data analysis</b>    | <b>Ethical considerations</b>                                                                  |
|----|----------------------------------------|---------------------------------|-------------------------------------------------------------------------------------------------------------------------------------------------------------------------|------------------------------------------------------------------------------------------------|-----------------------------------------------------------------------------------------------------------|-----------------------------------------------------|------------------------------------------------------------------------------------------------|
| 42 | <b>Reitmanova and Gustafson (2008)</b> | Maternity care, Canada          | To explore the maternity health care needs and barriers to accessing maternal health services from the perspective of immigrant Muslim women living in Canada           | Interview study                                                                                | 6 Muslim women                                                                                            | Thematic analysis                                   | Approval by Research Ethics Committee of University                                            |
| 43 | <b>Rice (2000)</b>                     | Maternity care, Australia       | To explore the policy of rooming-in within maternity hospitals in Australia and to argue for a more flexible policy when providing care to women from Asian backgrounds | Interview study                                                                                | 27 Hmong women<br>8 Vietnamese women<br>8 Cambodian women                                                 | Thematic analysis                                   | Efforts to deal with ethical considerations:<br>-Informed consent                              |
| 44 | <b>Suurmond et al. (2011)</b>          | Hospital care, Netherland       | To explore negative events in hospital care as perceived by immigrant patients                                                                                          | Interview study ( <i>individual and group interviews</i> )                                     | 22 respondents ( <i>Turkish, Chinese, Italian, Dominican, Chilean, Portuguese and Surinamese origin</i> ) | Framework analysis                                  | Efforts to deal with ethical considerations:<br>-anonymity<br>respondents<br>-informed consent |
| 45 | <b>Vangen et al. (2003)</b>            | Maternity care, Norway          | To explore how perinatal care practice may influence labour outcomes among circumcised women                                                                            | Interview study                                                                                | 23 Somali women ( <i>reported</i> )<br>36 Norwegian health care professionals ( <i>not reported</i> )     | Systematical analysis                               | Approval by Regional Ethical Research Committee                                                |
| 46 | <b>Vyndelingum (2000)</b>              | Acute care, England             | To explore the 'lived experiences' of acute hospital care from South Asian patients                                                                                     | Interview study                                                                                | 10 patients ( <i>Hindus, Muslims, Sikhs</i> ) ( <i>reported</i> )<br>6 carers ( <i>not reported</i> )     | Heideggerian hermeneutics phenomenological approach | Approval by local Ethics Committee                                                             |
| 47 | <b>Watson et al. (2002)</b>            | Acute maternity care, Australia | To explore maternity experiences of indigenous women admitted to an acute care setting prior to or after the birth of their baby                                        | Interview study ( <i>informal "chat style"</i> ) ( <i>part of larger three-stage project</i> ) | 12 indigenous women ( <i>Aboriginal and Torres Strait Islander</i> )                                      | Descriptive approach                                | Approval prior to commencement of three-stage project                                          |

|    | Author(s) / Year                    | Care setting/ Country         | Aim(s) of the study                                                                                                                                                       | Method                                                                                                                                                                                                                                                         | Sample & ethnicity patient                                                                                                           | Theoretical framework & data analysis                                                                           | Ethical considerations                                                                                                                    |
|----|-------------------------------------|-------------------------------|---------------------------------------------------------------------------------------------------------------------------------------------------------------------------|----------------------------------------------------------------------------------------------------------------------------------------------------------------------------------------------------------------------------------------------------------------|--------------------------------------------------------------------------------------------------------------------------------------|-----------------------------------------------------------------------------------------------------------------|-------------------------------------------------------------------------------------------------------------------------------------------|
| 48 | Wikberg, Eriksson and Bondas (2012) | Maternity care, Finland       | To explore perceptions and experiences of caring of immigrant new mothers from an intercultural perspective in maternity care in Finland                                  | Interview and observational study                                                                                                                                                                                                                              | 17 women from 12 countries<br>(Australia, Bosnia, Burma, Colombia, Estonia, Hungary, India, Iraq, Russia, Thailand, Uganda, Vietnam) | Focused ethnography and Eriksson's theory of caritative caring approach & analysis according to Roper & Shapira | Approval by Ethical Committee of the hospital and recommendations of the Finnish National Advisory Board on Research Ethics were followed |
| 49 | Wiklund et al. (2000)               | Maternity care, Sweden        | To explore childbirth experiences of Somali women in Sweden and to study the meeting between Somali women giving birth in Sweden and Swedish antenatal and delivery care. | Interview study                                                                                                                                                                                                                                                | 9 Somali women (reported)<br>7 Somali men (not reported)                                                                             | Grounded theory approach                                                                                        | Approval by the Ethical Research Committee of Umea University                                                                             |
| 50 | Wilson (2010)                       | Mental health care clinic, US | To explore the perceptions of clients with mental illness regarding the overall effectiveness of psychiatric nursing care in meeting their cultural needs                 | <b>Mixed-method study</b><br>- qualitative interview study (reported)<br>- quantitative self-administered nurse questionnaire (not reported)                                                                                                                   | 16 African American patients (reported)<br>65 Registered Nurses (not reported)                                                       | Descriptive approach & thematic content analysis according to Kvale and Patton                                  | Efforts to deal with ethical considerations:<br>- Written consent (University's Institutional Review Board policies and guidelines)       |
| 51 | Wilson and Barton (2012)            | Hospital care, New Zealand    | To explore Maori experiences of hospitalisation in surgical or medical settings and how these might influence length of stay                                              | <b>Mixed-method study</b><br>- qualitative interview study (reported)<br>- quantitative retrospective interrupted time series study (not reported)<br>- structured review of the literature (not reported)<br>- medical-surgical discharge data (not reported) | 11 Maori (indigenous) patients                                                                                                       | Maori centred approach with case study methodology & thematic analysis                                          | Approval by the University Ethics Committee                                                                                               |

\* Essén, Binder & Johnsdotter (2011) and Binder (2012), \*\* Cheung (2002a) and (2002b), \*\*\* Cortis (2000a) and Cortis and Kendrick (2003) , \*\*\*\* Garret (2008a) and Garret (2008b) are respectively estimated as part of the same study
