# Supplementary material for: “How do ethnic minority patients experience the intercultural care encounter in hospitals? a systematic review of qualitative research”
Source: PubMed Central journal article supplement (PMC5244561; doi:10.1186/s12910-016-0163-8), 2017-01-19
Supplement: 12910_2016_163_MOESM3_ESM.pdf [file 12910_2016_163_MOESM3_ESM.pdf]

Additional file 3: Sensitivity Analysis

| Clear description of... |                              |                       |                       |                            |                                       |                              |                        |         | Sensitivity analysis      |           |                                            |
|-------------------------|------------------------------|-----------------------|-----------------------|----------------------------|---------------------------------------|------------------------------|------------------------|---------|---------------------------|-----------|--------------------------------------------|
| Nr                      | Qualitative studies          | aim/research question | background literature | study design and procedure | sampling method, incl./excl. criteria | data collection and analysis | ethical considerations | results | Rigor (result rapportage) | Relevance | Relative contribution (medium, high, low)* |
| 1.                      | Ameresekere et al. (2011)    | +                     | +                     | +/-                        | +                                     | +                            | +                      | +/-     | +                         | +/-       | Medium (Low)                               |
| 2.                      | Arnaert & Schaack (2006)     | +                     | +                     | +/-                        | +                                     | +                            | +                      | +       | +                         | +         | High                                       |
| 3.                      | Baker & Daigle (2000)        | +                     | +                     | +                          | +                                     | +                            | +                      | +       | +                         | +         | High                                       |
| 4.                      | Berggren et al. (2006)       | +                     | +                     | +                          | +                                     | +                            | +                      | +       | +                         | +         | High                                       |
| 5.                      | Binder et al. (2012a)        | +                     | +                     | +/-                        | +                                     | +                            | +                      | +       | +                         | +         | High                                       |
| 6.                      | Binder et al. (2012b)        | +                     | +                     | +                          | +                                     | +                            | +                      | +       | +                         | +/-       | Medium (High)                              |
| 7.                      | Chalmers & Omer-Hashi (2002) | +                     | +                     | +/-                        | +                                     | +                            | +                      | +       | +                         | +         | High                                       |
| 8.                      | Cheraghi et al. (2014)       | +                     | +                     | +/-                        | +                                     | +                            | +                      | +       | +                         | +         | High                                       |
| 9.                      | Cheung (2002a)               | +                     | +                     | +                          | +/-                                   | +                            | +                      | +       | +                         | +         | High                                       |
| 10.                     | Cheung (2002b)               | +                     | +                     | +                          | +/-                                   | +                            | +                      | +       | +                         | +         | High                                       |
| 11.                     | Cortis (2000a)               | +                     | +                     | +                          | +                                     | +                            | -                      | +       | +                         | +         | High                                       |
| 12.                     | Cortis (2000b)               | +                     | +/-                   | +                          | +                                     | +                            | -                      | +       | +                         | +         | High                                       |
| 13.                     | Cortis & Kendrick (2003)     | +                     | +                     | +                          | +                                     | +                            | -                      | +       | +                         | +         | High                                       |
| 14.                     | Eckhardt et al. (2006)       | +                     | +                     | +                          | +                                     | +                            | +                      | +       | +                         | +         | High                                       |
| 15.                     | Essén et al. (2011)          | +                     | +                     | +                          | +                                     | +                            | +                      | +       | +                         | +/-       | Medium (Low)                               |
| 16.                     | Essén et al. (2000)          | +                     | +                     | +                          | +                                     | +                            | +                      | +       | +                         | +/-       | Medium (Low)                               |

|     |                              |   |     |     |     |     |     |     |     |     |               |
|-----|------------------------------|---|-----|-----|-----|-----|-----|-----|-----|-----|---------------|
| 17. | Fenwick & Stevens (2004)     | + | +   | +   | -   | +   | +   | +/- | +   | +   | High          |
| 18. | Garrett et al.(2008a)        | + | -   | +   | +/- | +/- | +   | -   | -   | +   | Medium (High) |
| 19. | Garret et al. (2008b)        | + | +   | +   | +/- | +   | +   | +   | +   | +   | High          |
| 20. | Grewal et al. (2008)         | + | +   | +   | +   | +   | +   | +   | +   | +/- | Medium (High) |
| 21. | Hanrahan (2002)              | + | -   | +/- | +/- | +   | +   | +/- | -   | -   | Low           |
| 22. | Harle et al. (2007)          | + | +   | +   | +   | +   | +   | +   | +   | +/- | Medium (High) |
| 23. | Herrel et al. (2004)         | + | +/- | +/- | +/- | +/- | +   | +   | +/- | +   | Medium (High) |
| 24. | Higginbottom et al. (2013)   | + | +   | +   | +   | +   | +   | +   | +   | +/- | Medium (High) |
| 25. | Higginbottom et al. (2015)   | + | +   | +   | +   | +   | +   | +   | +   | +   | High          |
| 26. | Hill et al. (2012)           | + | +   | +/- | +   | +   | +   | +/- | +   | +/- | Medium (High) |
| 27. | Hoang et al. (2009)          | + | +   | +   | +   | +   | +   | +   | +   | +   | High          |
| 28. | Johnson (2002)               | + | +   | +   | +/- | -   | +   | +   | +   | +   | High          |
| 29. | Jonkers et al. (2011)        | + | -   | +/- | +/- | +   | +   | +   | +/- | +   | Medium (High) |
| 30. | Killoran & Moyer (2006)      | + | +   | +/- | +   | +   | +/- | +   | +   | +/- | Medium (Low)  |
| 31. | Lee et al. (2014)            | + | +   | +   | +   | +   | +   | +   | +   | +   | High          |
| 32. | Liamputtong & Watson (2006)  | + | +   | +   | +   | +   | +   | +   | +   | +   | High          |
| 33. | Lim et al.(2012)             | + | +   | +   | +   | +   | +   | +   | +   | +   | High          |
| 34. | Lundberg & Gerezgiher (2008) | + | +   | +   | +   | +   | +   | +   | +   | +/- | Medium (High) |
| 35. | Maputle & Jali (2006)        | + | +/- | +   | +/- | +/- | +/- | -   | -   | -   | Low           |
| 36. | McFadden et al. (2013)       | + | +   | +/- | +/- | +   | +   | +   | +   | -   | Medium (Low)  |

|     |                               |   |     |     |     |     |     |   |     |     |               |
|-----|-------------------------------|---|-----|-----|-----|-----|-----|---|-----|-----|---------------|
| 37. | Missal et al. (2015)          | + | +   | +   | +   | +   | +   | + | +   | +   | High          |
| 38. | Murray et al. (2010)          | + | +   | +   | +   | +   | +   | + | +   | +   | High          |
| 39. | Niner et al. (2013)           | + | +   | +/- | +/- | +/- | -   | + | -   | +   | Medium (High) |
| 40. | Pasco et al. (2004)           | + | +   | +   | +/- | +/- | +   | + | +   | +   | High          |
| 41. | Qureshi & Pacquiao (2013)     | + | +   | +   | +   | +/- | +/- | + | +   | -   | Medium (Low)  |
| 42. | Reitmanova & Gustafson (2008) | + | +   | +/- | +   | +   | +   | + | +   | +   | High          |
| 43. | Rice (2000)                   | + | +   | +/- | +   | +   | +/- | + | +   | +   | High          |
| 44. | Suurmond et al. (2011)        | + | +   | +/- | +   | +   | +   | + | +   | +   | High          |
| 45. | Vangen et al. (2013)          | + | +   | +   | +   | +   | +   | + | +   | +/- | Medium (High) |
| 46. | Vydelingum (2000)             | + | +   | +   | +   | +   | +   | + | +   | +   | High          |
| 47. | Watson (2002)                 | + | +   | +   | +   | +/- | +/- | + | +   | +   | High          |
| 48. | Wikberg (2012)                | + | +   | +   | +   | +   | +   | + | +   | +   | High          |
| 49. | Wiklund (2000)                | + | +/- | +   | +   | +   | +   | + | +   | +/- | Medium (High) |
| 50. | Wilson (2012)                 | + | +   | +/- | +/- | +/- | +   | + | +/- | +   | Medium (High) |
| 51. | Wilson (2010)                 | + | +   | +   | +   | +   | +   | + | +   | +   | High          |

\*in case of a “medium” relative contribution, we nuanced this contribution as being rather “medium /low” or “medium/ high” based on the articles’ relevance and not on their rigor
